# Supplementary material
Source: publisher figshare collection journal article supplement (https://acs.figshare.com/ndownloader/files/6003048)
Supplement: Supplementary file 1 [file 6003048]

## Supporting Information

### A Simple and Expedient Procedure for the Preparation of Gabapentin Lactam (2-aza-spiro[4,5]decan-3-one)

Jashuva V. P. Katuri<sup>\*b,c</sup> Vadiraj S. Ekkundi<sup>b</sup> and Kuppuswamy Nagarajan<sup>\*a</sup>

<sup>a</sup>Hikal Ltd , 3<sup>rd</sup> Floor, Grey Rock, No.10, 24<sup>th</sup> Main, J. P Nagar 2<sup>nd</sup> Phase, Bangalore 560078, Karnataka, India.

<sup>b</sup>Hikal Ltd, International Biotech Park, Hinjewadi, Pune 411057, Maharashtra, India.

<sup>c</sup>Department of Natural Product Chemistry, CSIR-Indian Institute of Chemical Technology (CSIR-IICT), Hyderabad 500007, India.

Email: [jashuva@iict.res.in](mailto:jashuva@iict.res.in), [k\\_nagarajan@hikal.com](mailto:k_nagarajan@hikal.com)

| Contents:          | Page Number |
|--------------------|-------------|
| NMR Spectra        | 2           |
| HPLC Chromatograms | 10          |

N-chloroamide (3):

<sup>1</sup>H-NMR of 3 (Main page):

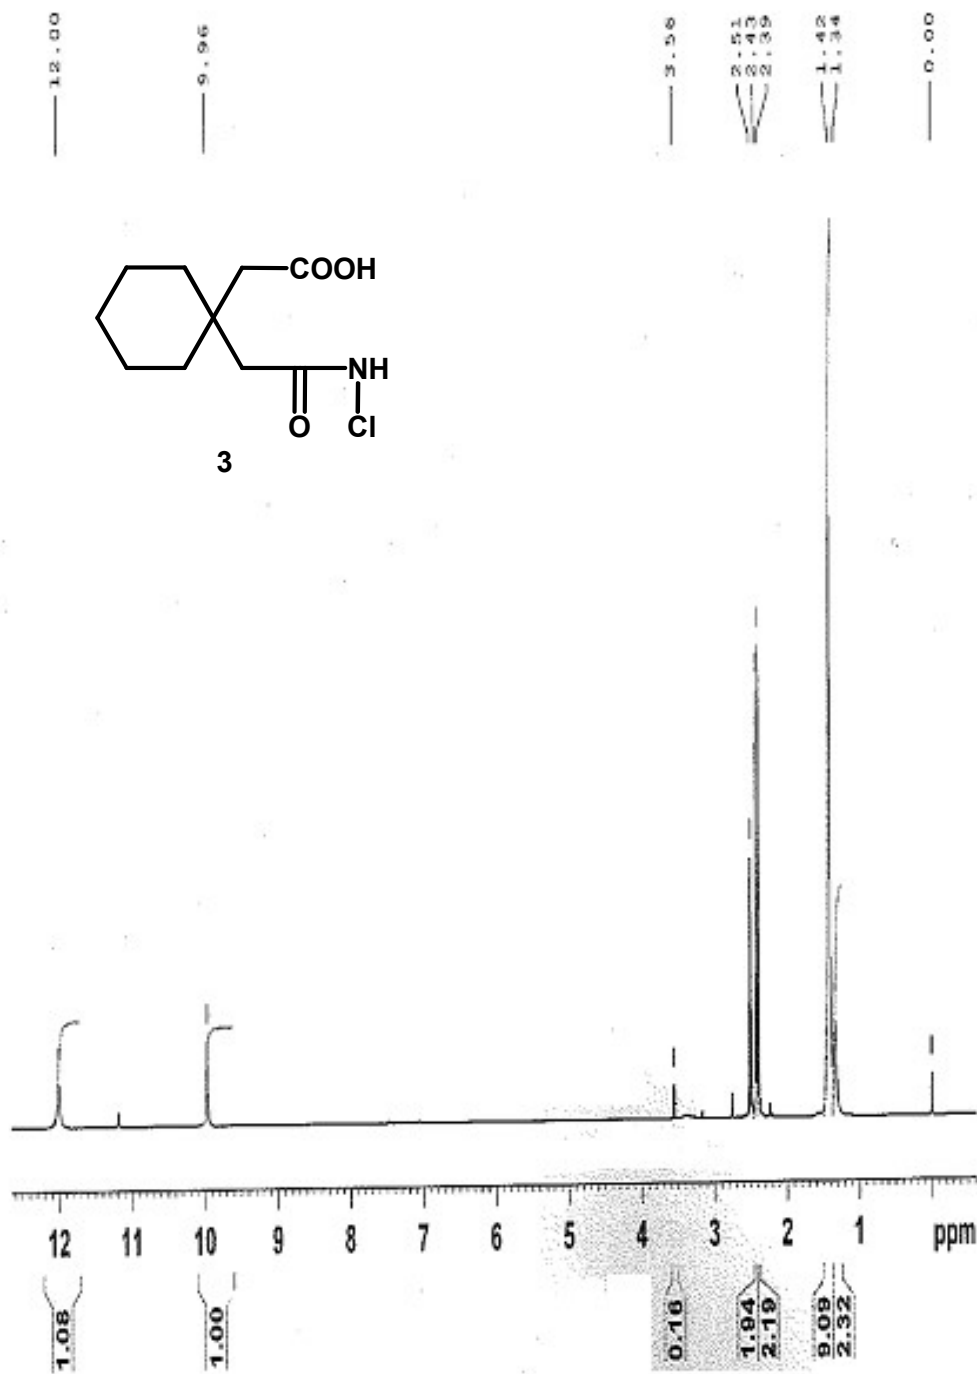

**<sup>1</sup>H-NMR of 3 (Expanded page):**

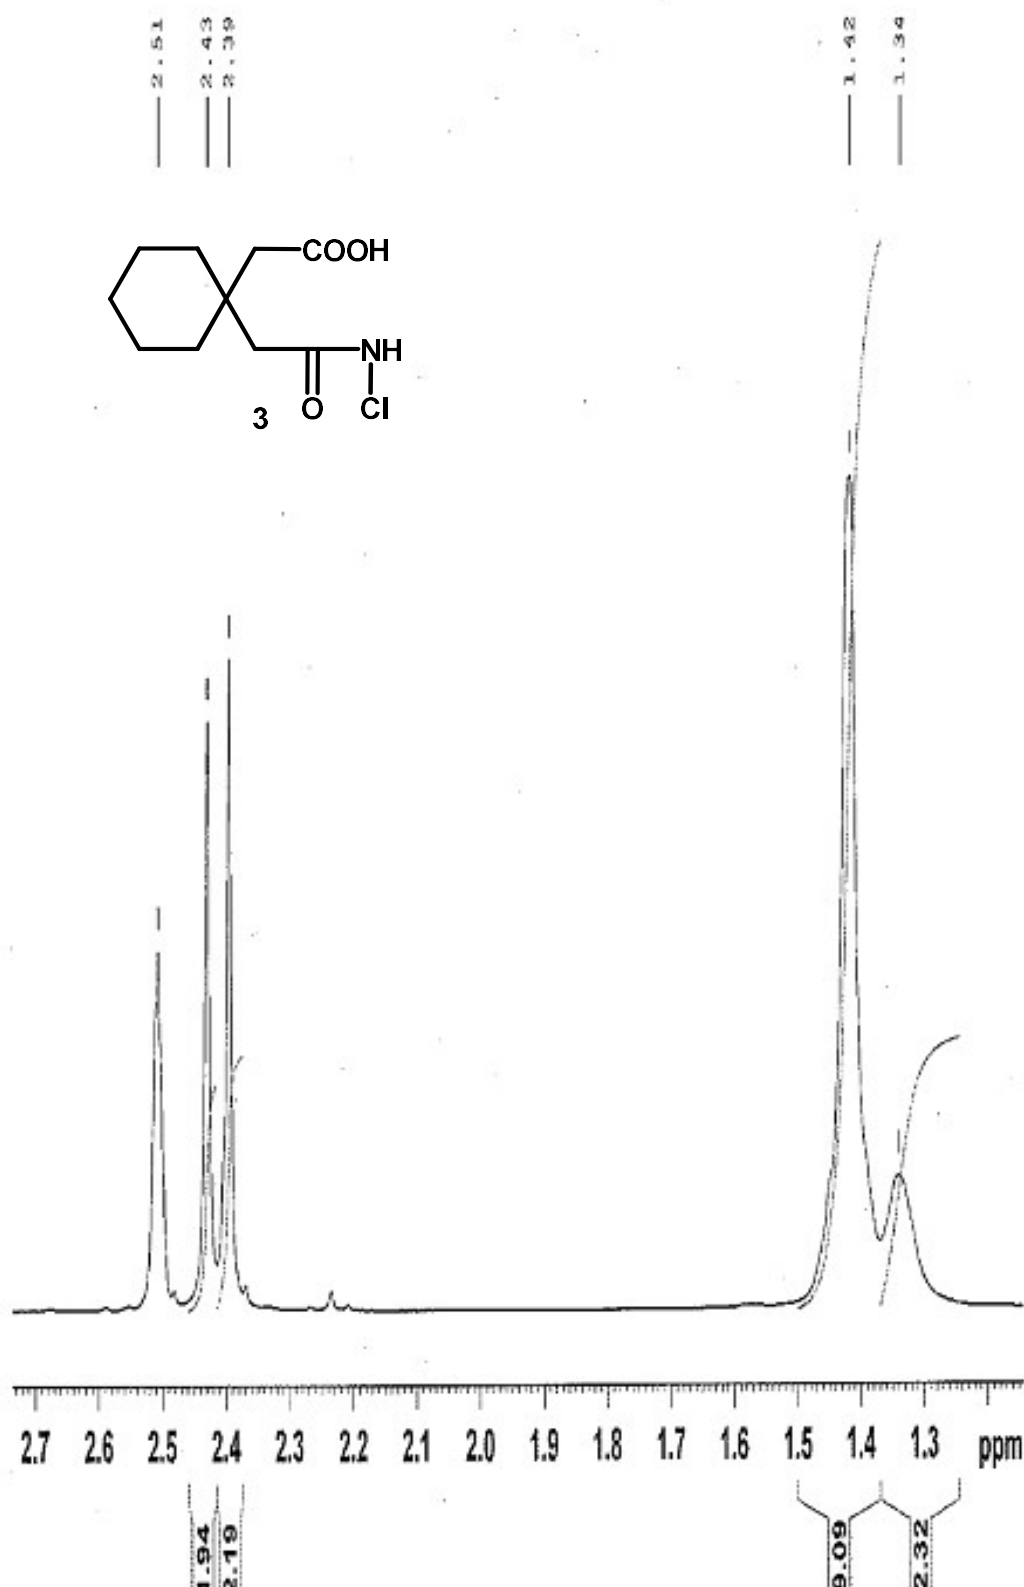

<sup>13</sup>C-NMR of 3 (Main page):

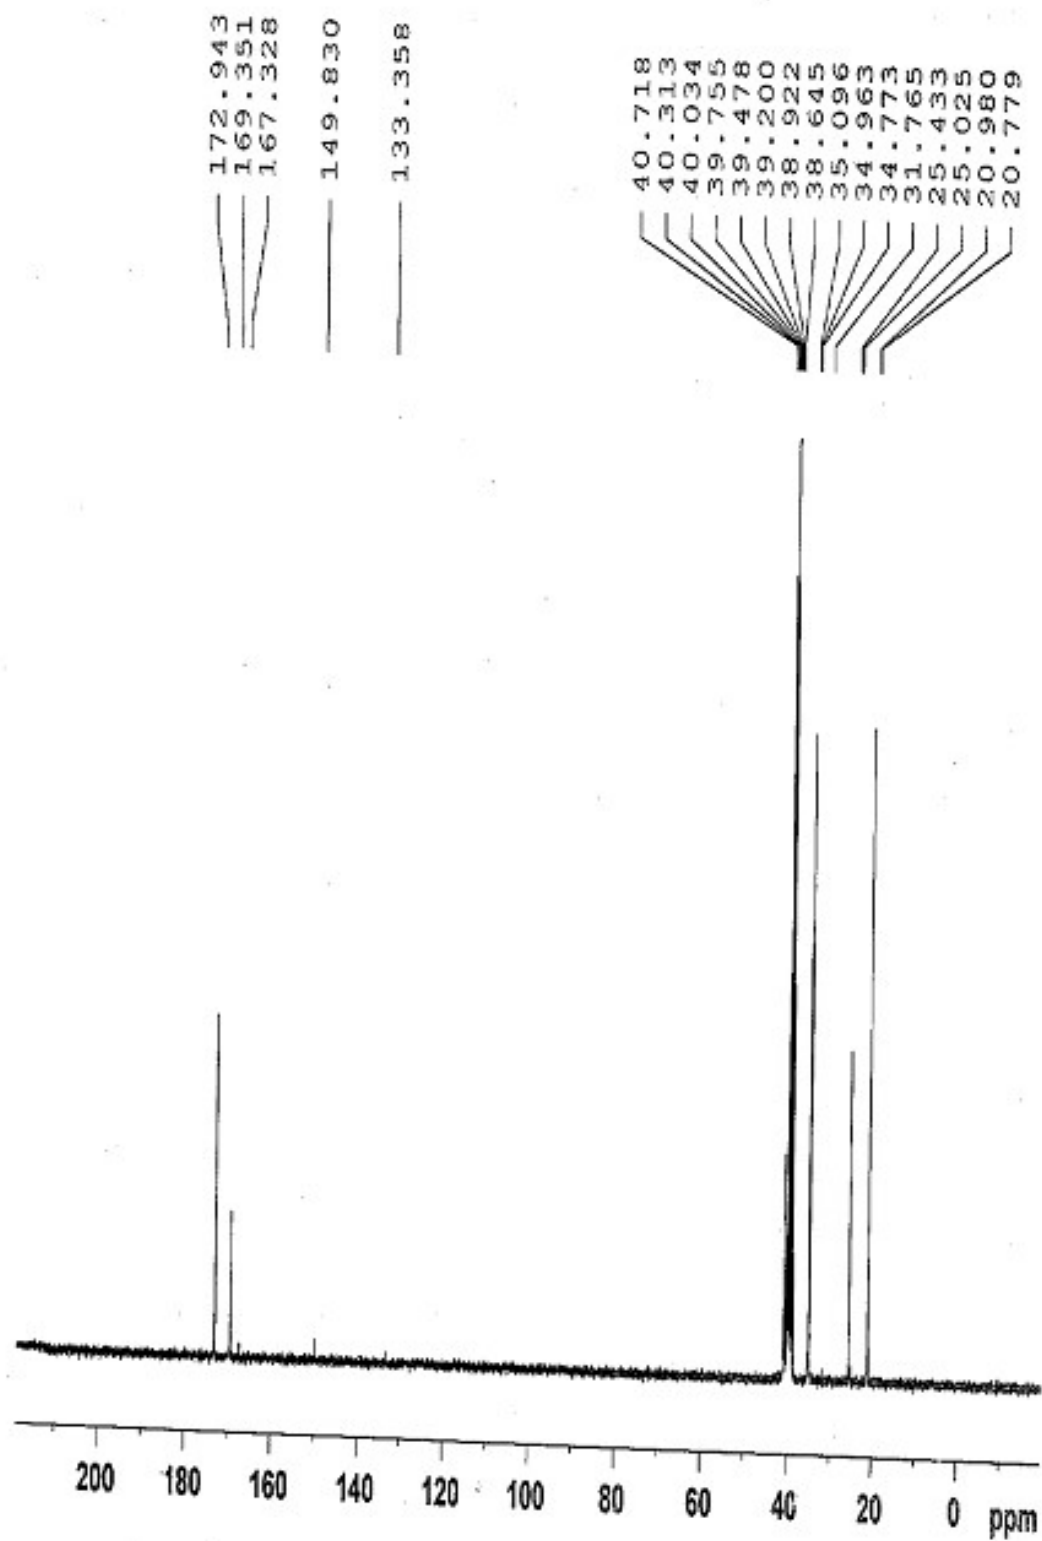

<sup>13</sup>C-NMR of 3 (Expanded page):

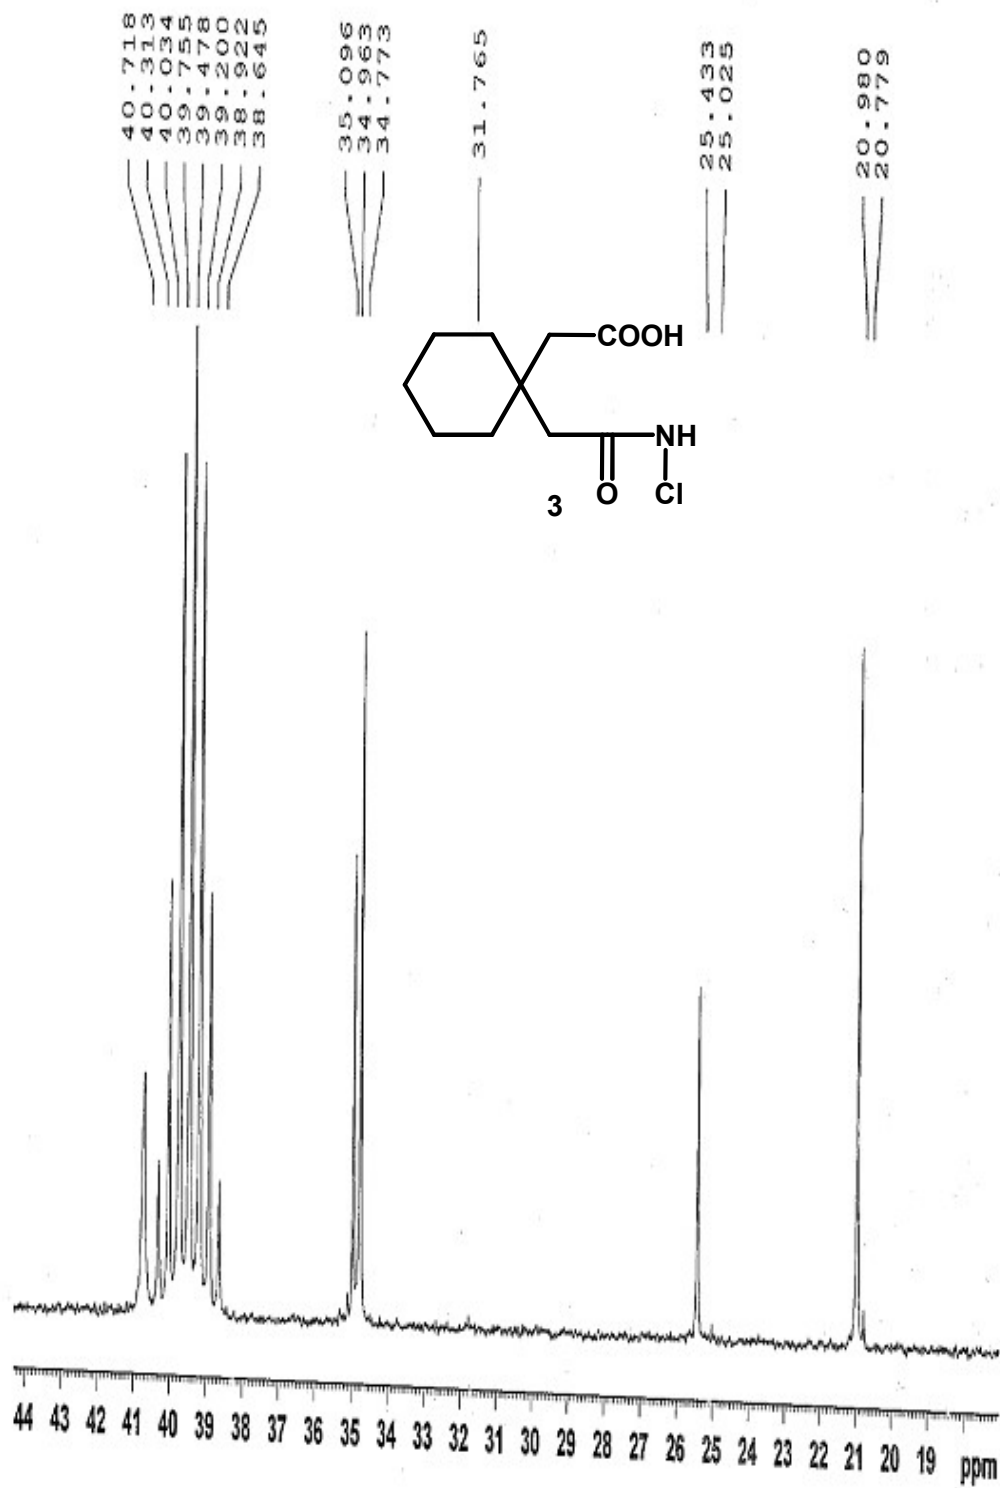

## High Resolution Mass Spectrum of 3:

**Sample Name** SCS-JVP-197 **Position** Vial 1 **Instrument Name** Instrument 1 **User Name**  
**Inj Vol** 1 **InjPosition** **SampleType** Sample **IRM Calibration Status** Success  
**Data Filename** SCS-JVP-197.d **ACQ Method** **Comment** **Acquired Time** 8/25/2016 4:20:37 F

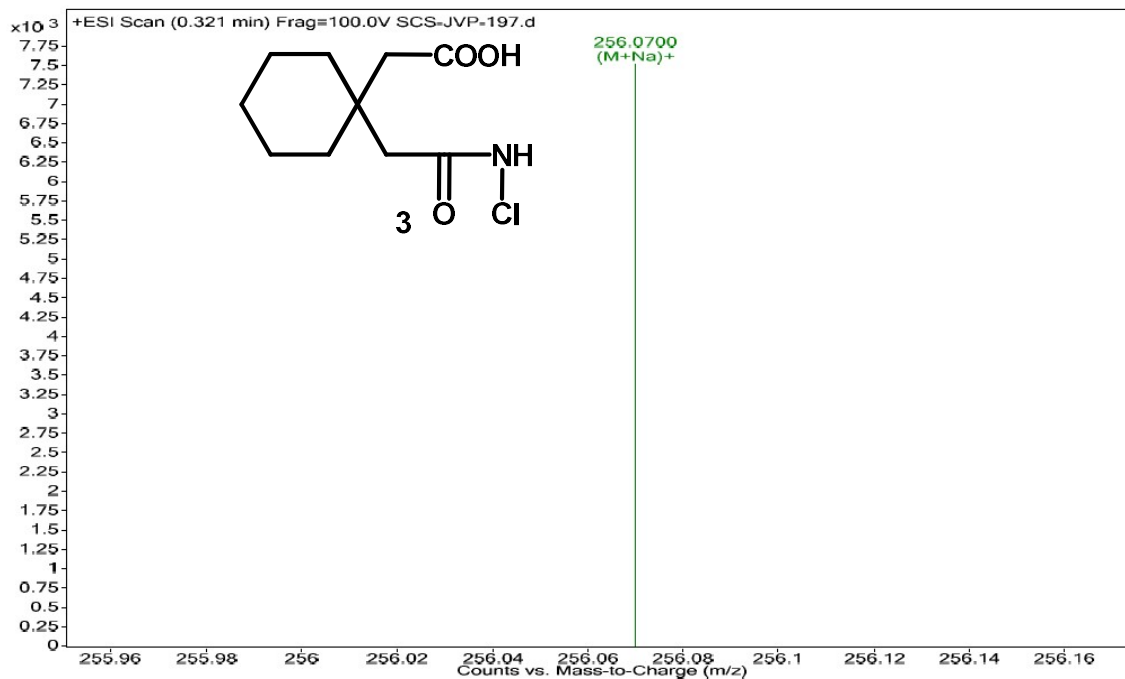

MS Formula Results: + Scan (0.321 min) - SCS-JVP-197.d (SCS-JVP-197.d)

| m/z    | Ion     | Formula       | Abundance |
|--------|---------|---------------|-----------|
| 256.07 | (M+Na)+ | C10H15ClNNaO3 | 7507      |

  

| Best                                | Formula (M)  | Ion Formula     | Calc m/z | Score | Cross Score | Mass     | Calc Mass | Diff (ppm) | Abs Diff (ppm) | Abund Match | Spacing Match | Mass Match | m/z    | DBE |
|-------------------------------------|--------------|-----------------|----------|-------|-------------|----------|-----------|------------|----------------|-------------|---------------|------------|--------|-----|
| <input checked="" type="checkbox"/> | C10H16ClN O3 | C10H16ClN Na O3 | 256.0711 | 42.84 |             | 233.0808 | 233.0819  | 4.79       | 4.79           | 0           | 0             | 89.97      | 256.07 | 3   |

IR spectrum of 3:

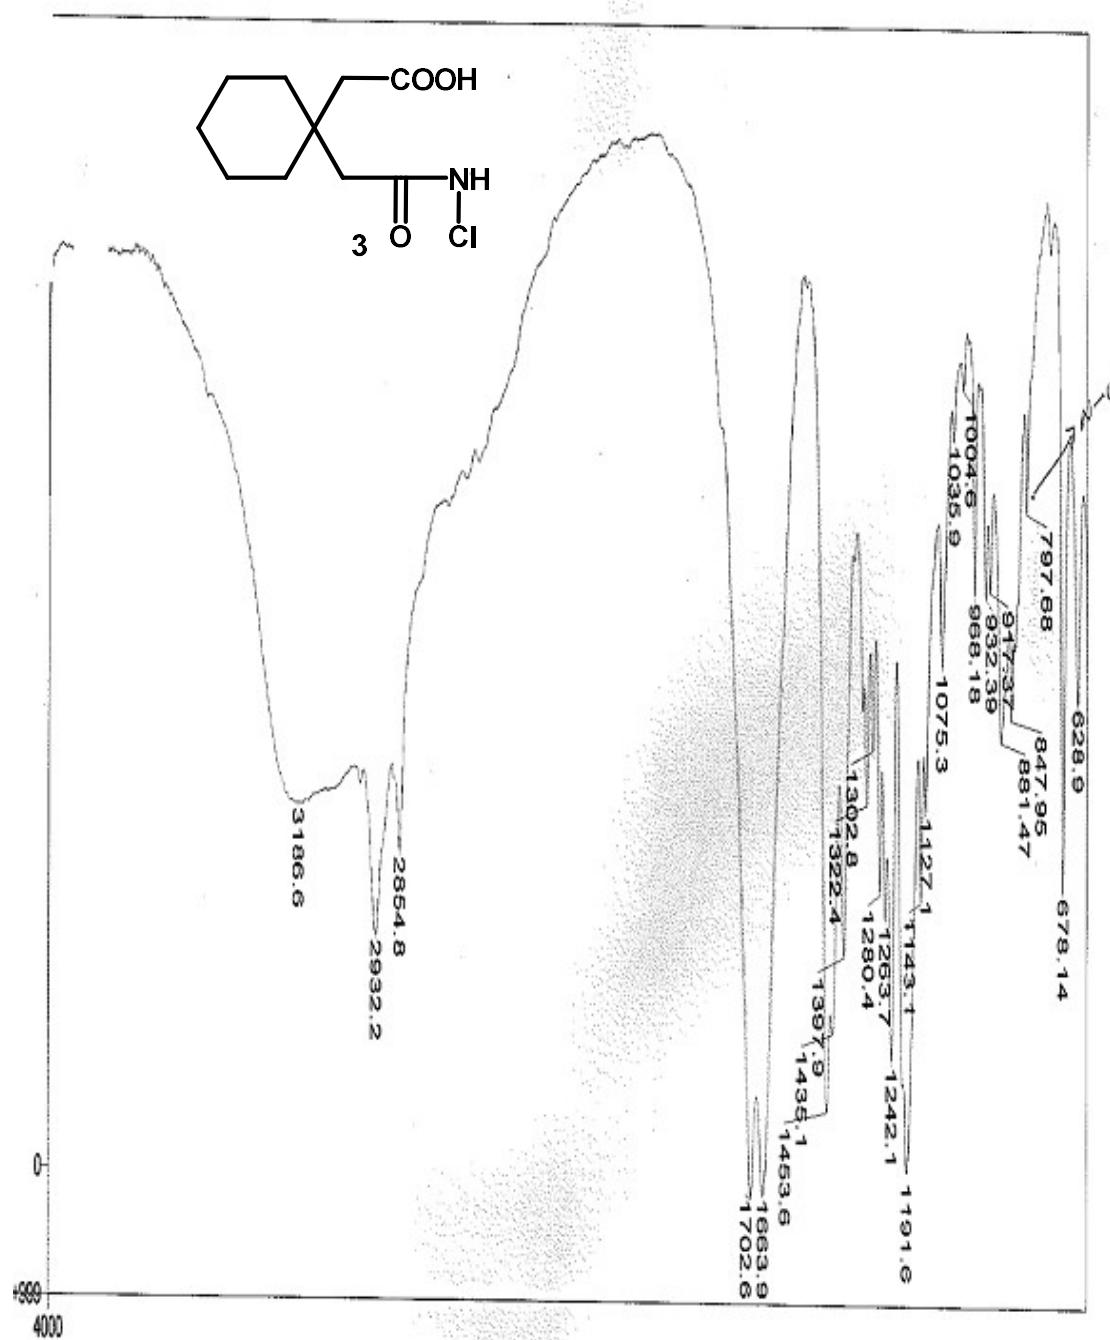

<sup>1</sup>H-NMR of 4:

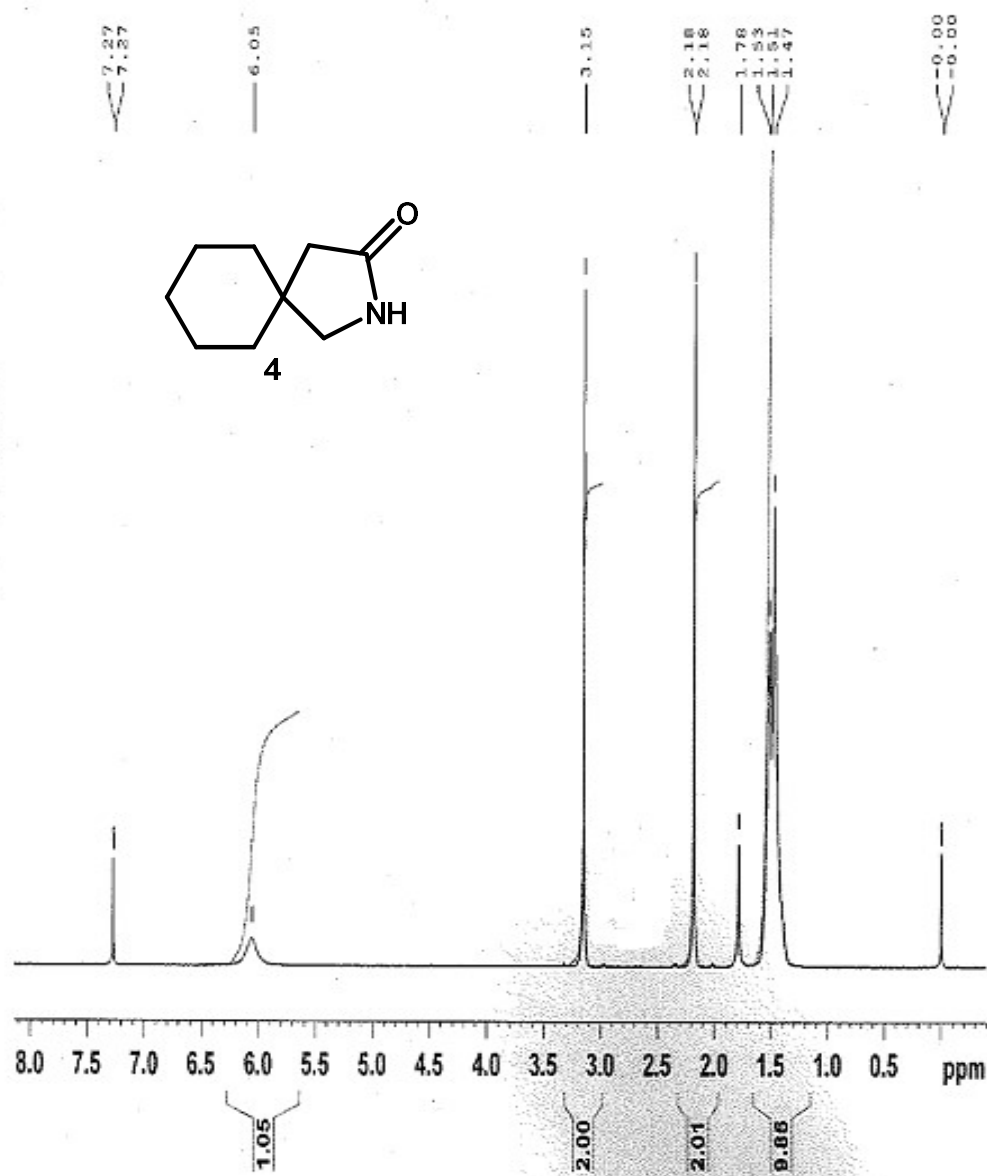

<sup>13</sup>C-NMR of 4:

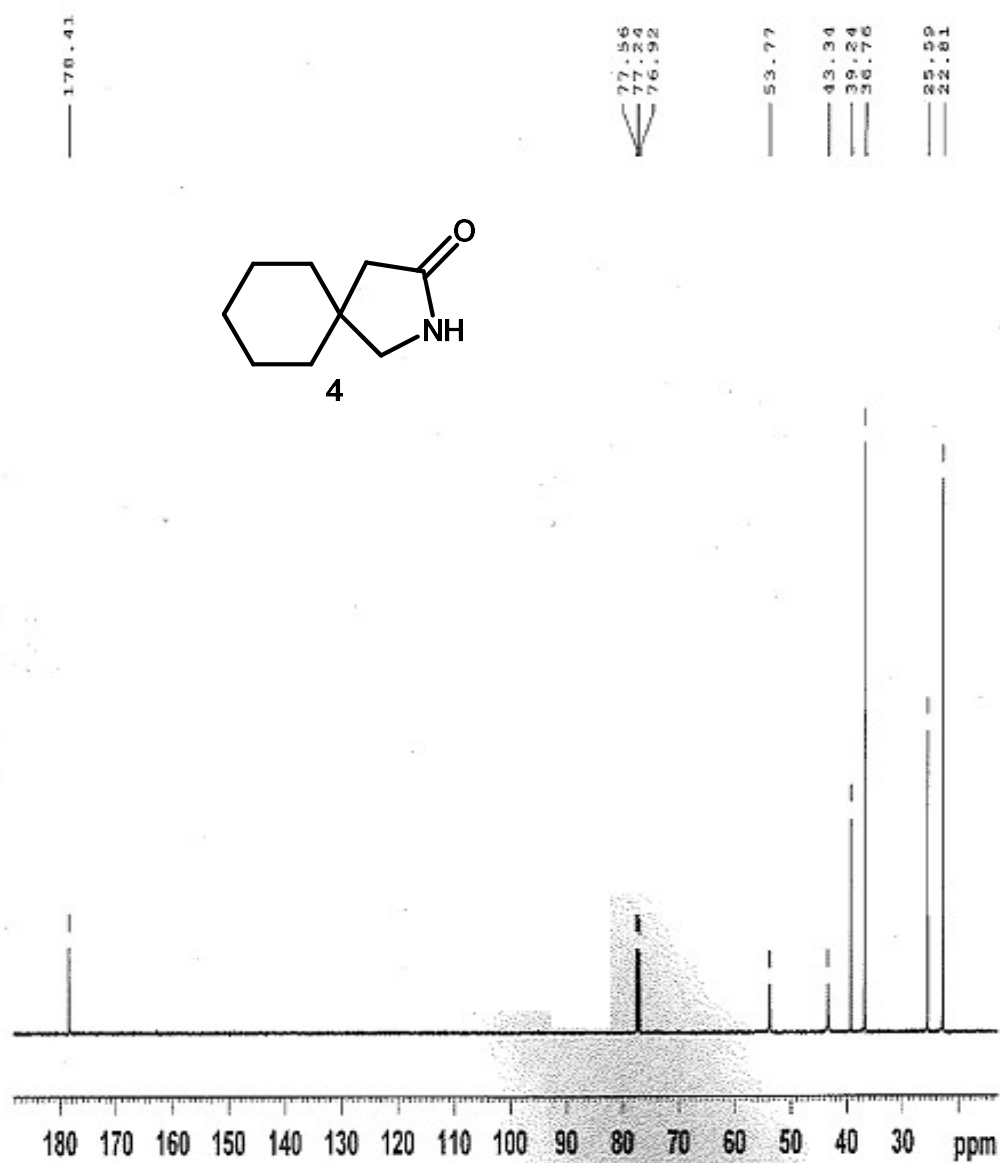

# HPLC purity of gabapentin lactam (4) obtained from example 1:

Sample ID : Gabalactam, B.N.-GP/JVP/639/34  
 eUser : Roopa  
 File Name : D:\System 90\LC\_12\Data\2012\May-2012\05052012\Gaba lcms\05\_May\_009.dat  
 Method : D:\System 90\LC\_12\Method\Gabapentin LCMS 1.met  
 Acquired : 5/5/2012 6:07:11 PM  
 Printed : 5/5/2012 7:07:18 PM

## Chromatographic Conditions :

Column : Atlantis T-3 150mm x 4.6mm x 3u  
 Mobile phase : 50:50/0.05% Formic acid in Water:Methanol  
 Detector : 210 nm , Flow :0.6 ml/min, Inj Vol :20µl Col temp:40° C

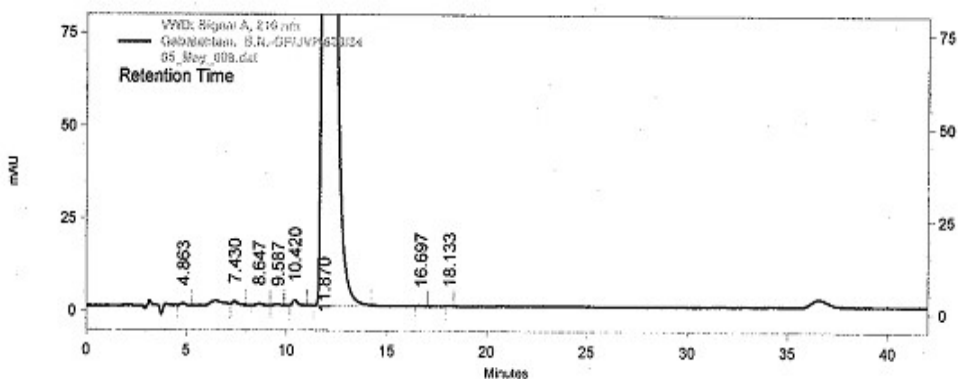

VWD: Signal  
 A, 210 nm  
 Results

| Pk # | Retention Time | Height   | Area      | Area Percent | Relative RT |
|------|----------------|----------|-----------|--------------|-------------|
| 1    | 4.863          | 7517     | 108894    | 0.0271       | 0.409       |
| 2    | 7.430          | 13670    | 218155    | 0.0542       | 0.626       |
| 3    | 8.647          | 7275     | 150359    | 0.0374       | 0.728✓      |
| 4    | 9.587          | 3328     | 80635     | 0.0200       | 0.807✓      |
| 5    | 10.420         | 22119    | 364212    | 0.0905       | 0.878✓      |
| 6    | 11.870         | 15234118 | 401463044 | 99.7537      | 1.000       |
| 7    | 16.697         | 2475     | 43574     | 0.0108       | 1.407       |
| 8    | 18.133         | 1751     | 25613     | 0.0064       | 1.528       |

|        |  |          |           |          |  |
|--------|--|----------|-----------|----------|--|
| Totals |  | 15292253 | 402454486 | 100.0000 |  |
|--------|--|----------|-----------|----------|--|

9/5/11

## HPLC purity of gabapentin lactam (4) obtained from example 2:

### Sample Details

Sample ID : Gabalactum B.No.GP/JVP/639/75  
 User Name : Raj  
 Filename : E:\System No 44\Le\_03\Data\2012\Nov-2012\22112012\Gabalactum\22\_Nov\_008  
 Method Name : E:\System No 44\Le\_03\Method\Gabalactum LCMS.met  
 Sequence Name : {Sequence Name}  
 Run Time : 11/22/2012 6:12:32 PM  
 Print Time : 11/22/2012 8:28:18 PM

### Chromatographic Conditions

Column : Atlantis T-13 150X4.6X3u  
 Mobile Phase : 50:50/0.05%Formic acid in water :Methanol Col temp: 40° C  
 Wavelength : 210nm, Flow Rate :0.6ml/min Injection volume : 20ul,

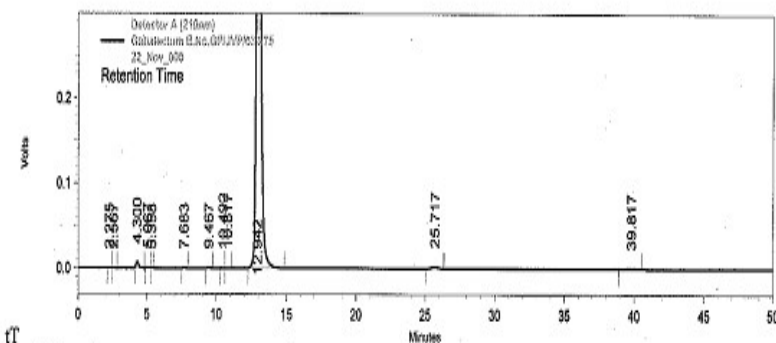

tT

Area % Report

Detector A  
(210nm)

| Pk # | Retention Time | Area     | Height | Area Percent | Relative RT |
|------|----------------|----------|--------|--------------|-------------|
| 1    | 2.275          | 4565     | 477    | 0.0321       | 0.18        |
| 2    | 2.567          | 4739     | 503    | 0.0334       | 0.20        |
| 3    | 4.300          | 91041    | 7020   | 0.6407       | 0.33        |
| 4    | 5.067          | 8341     | 785    | 0.0587       | 0.39        |
| 5    | 5.358          | 446      | 58     | 0.0031       | 0.41        |
| 6    | 7.683          | 6313     | 509    | 0.0444       | 0.59        |
| 7    | 9.467          | 7304     | 562    | 0.0514       | 0.73        |
| 8    | 10.492         | 1803     | 162    | 0.0127       | 0.81        |
| 9    | 10.817         | 2386     | 128    | 0.0168       | 0.84        |
| 10   | 12.942         | 13980516 | 633130 | 98.3942      | 1.00        |
| 11   | 25.717         | 73649    | 2378   | 0.5183       | 1.99        |
| 12   | 39.817         | 27577    | 532    | 0.1941       | 3.08        |

|        |  |          |        |          |  |
|--------|--|----------|--------|----------|--|
| Totals |  | 14208680 | 646244 | 100.0000 |  |
|--------|--|----------|--------|----------|--|

Sakya  
12/11/12

## HPLC purity of gabapentin lactam (4) obtained from example 3:

### Sample Details

Sample ID : Gabalactum B.No.GP/JVP/RG/665/35  
 User Name : Uday  
 Filename : E:\System No 44\Le\_03\Data\2012\September2012\23092012\GabaLACTUM\23\_Sept\_006  
 Method Name : E:\System No 44\Le\_03\Method\Gabalactum LCMS.met  
 Sequence Name : {Sequence Name}  
 Run Time : 9/23/2012 2:21:15 PM  
 Print Time : 9/22/2012 3:29:24 PM

### Chromatographic Conditions

Column : Atlantis T-13 150X4.6X3u  
 Mobile Phase : 50:50/0.05%Formic acid in water :Methanol Col temp: 40° C  
 Wavelength : 210nm, Flow Rate :0.6ml/min Injection volume : 20ul,

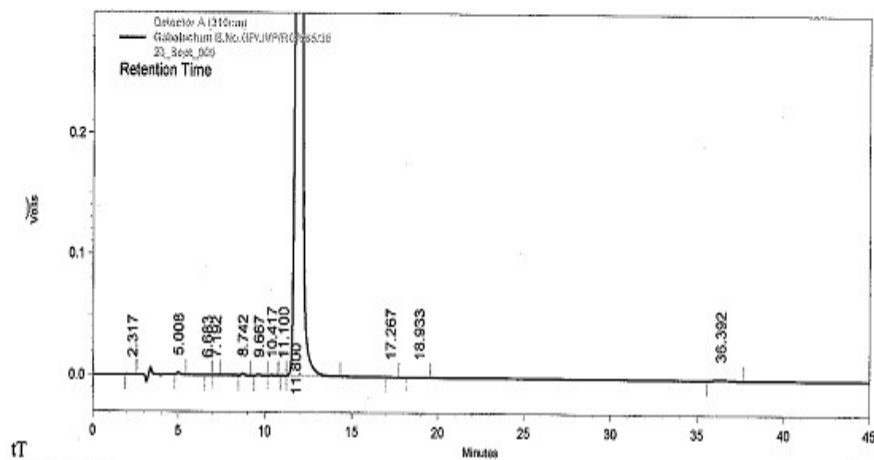

IT

Area % Report  
Detector A  
(210nm)

| Pk # | Retention Time | Area     | Height | Area Percent | Relative RT |
|------|----------------|----------|--------|--------------|-------------|
| 1    | 2.317          | 2839     | 197    | 0.013        | 0.20        |
| 2    | 5.008          | 20121    | 1682   | 0.092        | 0.42        |
| 3    | 6.683          | 1966     | 187    | 0.009        | 0.57        |
| 4    | 7.192          | 690      | 55     | 0.003        | 0.61        |
| 5    | 8.742          | 16263    | 1283   | 0.074        | 0.74        |
| 6    | 9.667          | 8591     | 572    | 0.039        | 0.82        |
| 7    | 10.417         | 4743     | 338    | 0.022        | 0.88        |
| 8    | 11.100         | 569      | 59     | 0.003        | 0.94        |
| 9    | 11.800         | 21830378 | 915848 | 99.503       | 1.00        |
| 10   | 17.267         | 1079     | 46     | 0.005        | 0.00        |
| 11   | 18.933         | 2430     | 87     | 0.011        | 0.00        |
| 12   | 36.392         | 49797    | 989    | 0.227        | 3.09        |

|        |  |          |        |         |  |
|--------|--|----------|--------|---------|--|
| Totals |  | 21939466 | 921343 | 100.000 |  |
|--------|--|----------|--------|---------|--|

# HPLC purity of gabapentin lactam (4) obtained from example 4:

Sample name : #GP/JVP/639/96 (DC DMH) - R&D Pune  
 Method name : D:\CLASS-VP\BNZ LACTAM\METHOD\BNZ FORMIC.met  
 Data file : D:\CLASS-VP\BNZ LACTAM\DATA\JUL - 2014\BNZ FORMIC\26052015\007  
 Sequence name : D:\CLASS-VP\BNZ LACTAM\SEQUENCE\BNZ FORMIC\May2015\25052015.seq  
 Acquired time : 26/05/2015 15:47:29  
 Print time : 26/05/2015 16:53:38  
 Injection Vol : 20  
 Vial : 10005  
 Instrument ID : AQC 06 (Offline)  
 Sample description : COLUMN ID : H-69 NEW

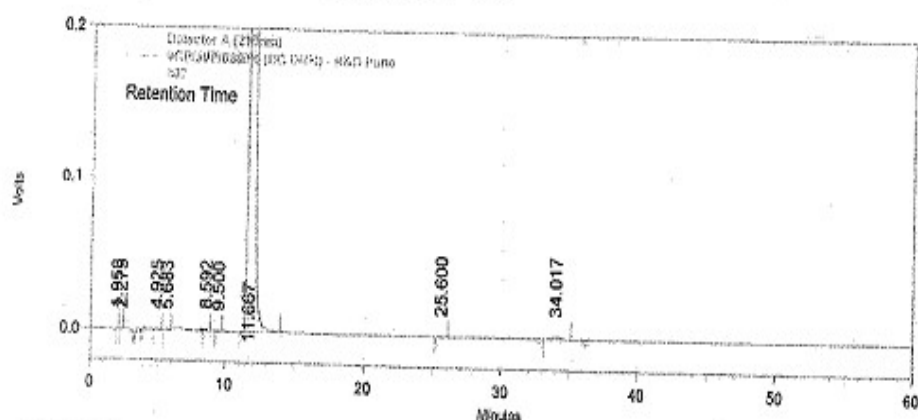

| Detector A (210nm) |      |                |          |              |             |         |
|--------------------|------|----------------|----------|--------------|-------------|---------|
|                    | Pk # | Retention Time | Area     | Area Percent | Relative RT | Name    |
| 1                  |      | 1.958          | 2026     | 0.01         | 0.17        | UNK     |
| 2                  |      | 2.275          | 2819     | 0.02         | 0.19        | UNK     |
| 3                  |      | 4.925          | 6381     | 0.03         | 0.42        | UNK     |
| 4                  |      | 5.683          | 4398     | 0.02         | 0.49        | UNK     |
| 5                  |      | 8.592          | 14476    | 0.08         | 0.74        | IMIDE   |
| 6                  |      | 9.500          | 4975     | 0.03         | 0.81        | UNK     |
| 7                  |      | 11.667         | 18477242 | 99.43        | 1.00        | BNZ     |
| 8                  |      | 25.600         | 2815     | 0.02         | 2.20        | UNK     |
| 9                  |      | 34.017         | 67264    | 0.36         | 2.92        | Solvent |
| Totals             |      |                | 18582396 | 100.00       |             |         |

1  
 26/5/15

# HPLC purity of gabapentin lactam (4) obtained from example 5:

Sample name : #GP/JVP/CGH/714/82T2  
 Method name : D:\CLASS-VP\BNZ LACTAM\METHOD\BNZ FORMIC.met  
 Data file : D:\CLASS-VP\BNZ LACTAM\DATA\JUL - 2014\BNZ FORMIC\27052015\003  
 Sequence name : D:\CLASS-VP\BNZ LACTAM\SEQUENCE\BNZ FORMIC\May2015\25052015.seq  
 Acquired time : 27/05/2015 11:19:55  
 Print time : 27/05/2015 13:50:50  
 Injection Vol : 20  
 Vial : 10003  
 Instrument ID : AQC 06 (Offline)  
 Sample description : COLUMN ID : ~~F-69~~ NEW

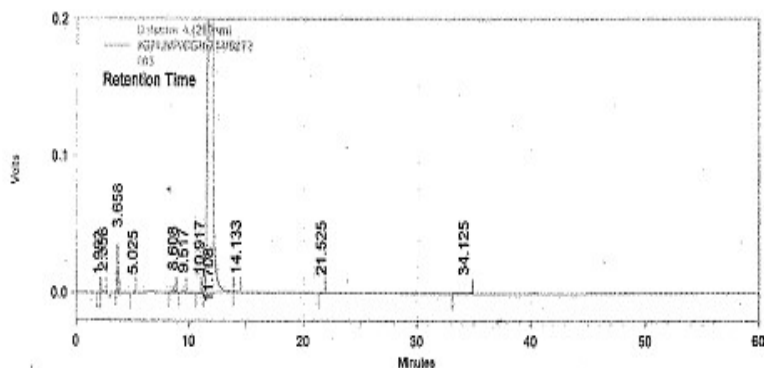

| Pk # | Retention Time | Area     | Area Percent | Relative RT | Name    |
|------|----------------|----------|--------------|-------------|---------|
| 1    | 1.992          | 1847     | 0.01         | 0.17        | Unknown |
| 2    | 2.358          | 17675    | 0.10         | 0.20        | Unknown |
| 3    | 3.658          | 285604   | 1.65         | 0.31        | Unknown |
| 4    | 5.025          | 4033     | 0.02         | 0.43        | Unknown |
| 5    | 8.608          | 38823    | 0.22         | 0.74        | Unknown |
| 6    | 9.517          | 22001    | 0.13         | 0.81        | IMIDE   |
| 7    | 10.917         | 2807     | 0.02         | 0.93        | Unknown |
| 8    | 11.708         | 16867585 | 97.67        | 1.00        | BNZ     |
| 9    | 14.133         | 6222     | 0.04         | 1.21        | Unknown |
| 10   | 21.525         | 1400     | 0.01         | 1.84        | Unknown |
| 11   | 34.125         | 22597    | 0.13         | 2.92        | Solvent |

known (starting material)  
 (4)

|        |  |          |        |  |  |
|--------|--|----------|--------|--|--|
| Totals |  | 17270594 | 100.00 |  |  |
|--------|--|----------|--------|--|--|

27/5/15

HPLC purity of gabapentin 1 obtained from gabalactam 4 via intermediate 3 (Gaba early method):<sup>1</sup>

Gabapentin API (1) obtained from first lot of gabapentin hydrochloride (5):

Sample ID : Gabapentin : GP/JVP/VVP/652/20A  
 User : Guru  
 File Name : D:\System No 83\LC\_13\Data\2012\May 2012\14052012\Gaba early\007-Rep1.dat  
 Method : D:\System No 83\LC\_13\Methods\Gaba early.met  
 Acquired : 5/14/2012 5:12:22 PM  
 Printed : 5/15/2012 8:48:01 AM  
**Chromatographic Conditions :**  
 Column : Phenomenex luna C-18 250 x 4.6 x 5µ Column no:178  
 Mobile Phase : Buffer:ACN / 76:24  
 Buffer : 1.83g sodium perchlorate + 0.58g amm.dihydrogen phosphate in 1 ltr water pH 1.8 with perchloric acid  
 Diluent : 2.32g amm. dihydrogen phosphate in 1ltr water pH 2.0 with OPA  
 Flow rate : 1.0ml/min, Volume: 20 µl , Oven Temp: 40 °C Detector : 215nm

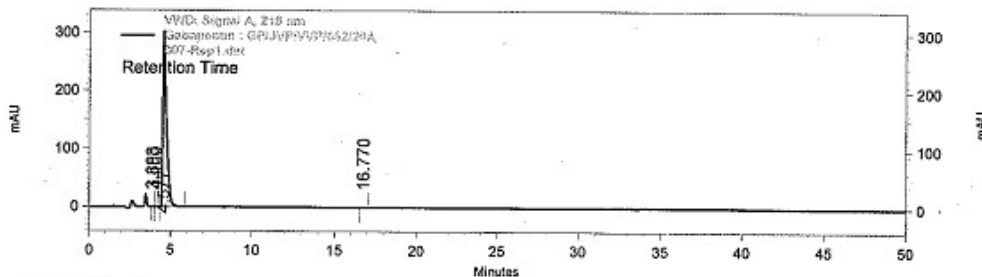

VWD: Signal  
 A, 215 nm  
 Results

| Pk #   | Retention Time | Height  | Area     | Area Percent | Relative RT |
|--------|----------------|---------|----------|--------------|-------------|
| 1      | 3.89           | 1601    | 8973     | 0.0118       | 0.850       |
| 2      | 4.10           | 1697    | 9828     | 0.0129       | 0.896       |
| 3      | 4.58           | 5050419 | 76262262 | 99.9460      | 1.000       |
| 4      | 16.77          | 1350    | 22429    | 0.0294       | 3.670       |
| Totals |                | 5055067 | 76303492 | 100.0000     |             |

Continued to page number 16

Sheet2

Gabapentin B.NO: Gp/JVP/652/20A

| GP Area  | Imp- E |
|----------|--------|
| 78377001 | 153037 |
| 78316065 | 158484 |
| 78123148 | 152623 |

| SAMPLE AREA |       |       |       | Unknown    | Unknown     |
|-------------|-------|-------|-------|------------|-------------|
| GABA        | IMP-E | IMP-A | IMP-B | Imp@1.4rrt | imp RRT 3.7 |
| 76262262    | 0     | 0     | 0     | 0          | 24795       |
| 76461137    |       |       |       |            |             |
| 76361700    | 0     | 0     | 0     | 0          | 24795       |

|         |          |
|---------|----------|
| Average | 76346533 |
| SD      | 43088.26 |
| RSD     | 0.056    |

|           |
|-----------|
| 154714.67 |
| 3270.90   |
| 2.11      |

|                 |                                                        |
|-----------------|--------------------------------------------------------|
| Imp-E Std       | 2.21                                                   |
| Std Prepr       | 351.98 mg of Gaba WS---->25 ML Add 2.5ml of Imp-E Soln |
| (GP WS + Imp E) |                                                        |
| Sample          | 141.58 mg of gaba ws to 10ml 14.158 mg/ml              |

Moisture Content-----&gt;0

| GP          | IMP-E      |
|-------------|------------|
| 14.079mg/ml | 0.009mg/ml |

|                         |           |        |      |     | Result % | LIMIT |
|-------------------------|-----------|--------|------|-----|----------|-------|
| Imp E                   | 0         | 0.009  | 1    | 100 | 0.0000   | 0.10% |
|                         | 154714.67 | 14.158 | 1    |     |          |       |
| Imp A                   | 0         | 0.009  | 1    | 100 | 0.0000   | 0.10% |
|                         | 154714.67 | 14.158 | 5.3  |     |          |       |
| Imp B                   | 0         | 0.009  | 1    | 100 | 0.0000   | 0.05% |
|                         | 154714.67 | 14.158 | 0.35 |     |          |       |
| Unknown Impurity 1.4RRT | 0         | 0.009  | 1    | 100 | 0.000    | 0.05% |
|                         | 154714.67 | 14.158 | 0.41 |     |          |       |

|         |          |        |        |     |       |              |
|---------|----------|--------|--------|-----|-------|--------------|
| ASSAY   | 76361700 | 14.079 | 100    | 100 | 99.46 | 98.7 to 101% |
| as such | 76346533 | 14.158 | 100.00 |     |       |              |

|                          |           |        |      |     |        |       |
|--------------------------|-----------|--------|------|-----|--------|-------|
| Unknown Impurity 3.7 RRT | 24795     | 0.009  | 1    | 100 | 0.0244 | 0.05% |
|                          | 154714.67 | 14.158 | 0.41 |     |        |       |

|                           |           |       |      |     |        |       |
|---------------------------|-----------|-------|------|-----|--------|-------|
| Unknown Impurity 0.85 RRT | 9559      | 0.009 | 1    | 100 | 0.0094 | 0.05% |
|                           | 154714.67 | 14.16 | 0.41 |     |        |       |

|                           |           |       |      |     |        |       |
|---------------------------|-----------|-------|------|-----|--------|-------|
| Unknown Impurity 0.89 RRT | 10827     | 0.01  | 1    | 100 | 0.0107 | 0.05% |
|                           | 154714.67 | 14.16 | 0.41 |     |        |       |

BP  
14/05/11

**Gabapentin API (1) obtained from second lot of gabapentin hydrochloride (5) (Gaba early method):**

Page 1 of 1

Sample ID : Gabapentin : GP/JVP/VVP/652/20 B  
 User : Guru  
 File Name : D:\System No 83\LC\_13\Data\2012\May 2012\14052012\Gaba early\008-Rep2.dat  
 Method : D:\System No 83\LC\_13\Methods\Gaba early-1.met  
 Acquired : 5/14/2012 7:34:47 PM  
 Printed : 5/14/2012 8:23:36 PM

**Chromatographic Conditions :**

Column : Phenomenex luna C-18 250 x 4.6 x 5 $\mu$  Column no: 178 21 L  
 Mobile Phase : Buffer: ACN / 76:24  
 Buffer : 1.83g sodium perchlorate + 0.58g amm.dihydrogen phosphate in 1 ltr water pH 1.8 with perchloric acid  
 Diluent : 2.32g amm. dihydrogen phosphate in 1ltr water pH 2.0 with OPA  
 Flow rate : 1.0ml/min, Volume: 20  $\mu$ l , Oven Temp: 40  $^{\circ}$ C Detector : 215nm

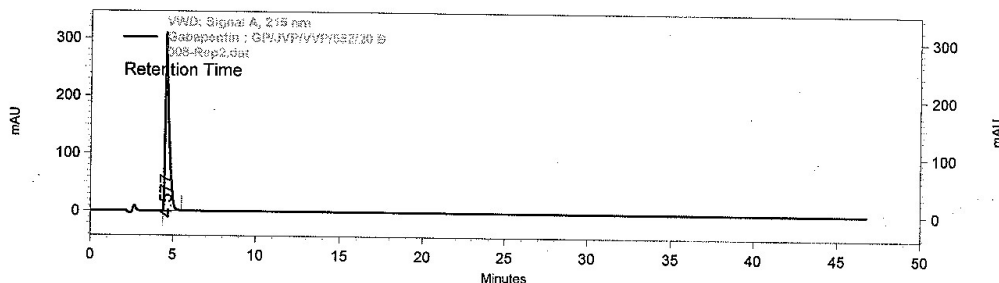

VWD: Signal  
 A, 215 nm  
 Results

| Pk #   | Retention Time | Height  | Area     | Area Percent | Relative RT |
|--------|----------------|---------|----------|--------------|-------------|
| 1      | 4.58           | 5170253 | 77636851 | 100.0000     | 1.000       |
| Totals |                | 5170253 | 77636851 | 100.0000     |             |

Continued to page number 18

Sheet2

Gabapentin B.NO: Gp/JVP/652/20B

| GP Area  | Imp- E |
|----------|--------|
| 76377001 | 153037 |
| 76316065 | 158484 |
| 76123148 | 152623 |

| SAMPLE AREA | IMP-E | IMP-A | IMP-B | Unknown<br>Imp@1.4rrt | Unknown<br>imp RRT 3.6 |
|-------------|-------|-------|-------|-----------------------|------------------------|
| GABA        |       |       |       |                       |                        |
| 77897610    | 0     | 0     | 0     | 0                     | 36394                  |
| 77636851    |       |       |       |                       |                        |
| 77767231    | 0     | 0     | 0     | 0                     | 36394                  |

|         |          |           |
|---------|----------|-----------|
| Average | 76346533 | 154714.67 |
| SD      | 43088.26 | 3270.90   |
| RSD     | 0.056    | 2.11      |

|                              |                                                        |
|------------------------------|--------------------------------------------------------|
| Imp-E Std                    | 2.21                                                   |
| Std Prepr<br>(GP WS + Imp E) | 351.98 mg of Gaba WS---->25 ML Add 2.5ml of Imp-E Soln |
| Sample                       | 144.54 mg of gaba ws to 10ml 14.454 mg/ml              |

Moisture Content-----&gt;0

| GP          | IMP-E      |
|-------------|------------|
| 14.079mg/ml | 0.009mg/ml |

| Imp E | 0         | 0.009  | 1 | 100 | Result % | LIMIT |
|-------|-----------|--------|---|-----|----------|-------|
|       | 154714.67 | 14.454 | 1 |     | 0.0000   | 0.10% |

| Imp A | 0         | 0.009  | 1   | 100 | Result % | LIMIT |
|-------|-----------|--------|-----|-----|----------|-------|
|       | 154714.67 | 14.454 | 5.3 |     | 0.0000   | 0.10% |

| Imp B | 0         | 0.009  | 1    | 100 | Result % | LIMIT |
|-------|-----------|--------|------|-----|----------|-------|
|       | 154714.67 | 14.454 | 0.35 |     | 0.0000   | 0.06% |

| Unknown<br>Impurity 1.4RRT | 0         | 0.009  | 1    | 100 | Result % | LIMIT |
|----------------------------|-----------|--------|------|-----|----------|-------|
|                            | 154714.67 | 14.454 | 0.41 |     | 0.000    | 0.05% |

| Unknown<br>Impurity<br>0.76 RRT | 25328     | 0.009 | 1    | 100 | Result % | LIMIT |
|---------------------------------|-----------|-------|------|-----|----------|-------|
|                                 | 154714.67 | 14.45 | 0.41 |     | 0.0244   | 0.05% |

| ASSAY<br>as such | 77767231 | 14.079 | 100    | 100 | Result % | LIMIT        |
|------------------|----------|--------|--------|-----|----------|--------------|
|                  | 76346533 | 14.454 | 100.00 |     | 99.22    | 98.7 to 101% |

| Unknown<br>Impurity<br>3.7 RRT | 36394     | 0.009  | 1    | 100 | Result % | LIMIT |
|--------------------------------|-----------|--------|------|-----|----------|-------|
|                                | 154714.67 | 14.454 | 0.41 |     | 0.0351   | 0.05% |

| Unknown<br>Impurity<br>0.85 RRT | 13875     | 0.009 | 1    | 100 | Result % | LIMIT |
|---------------------------------|-----------|-------|------|-----|----------|-------|
|                                 | 154714.67 | 14.45 | 0.41 |     | 0.0134   | 0.05% |

| Unknown<br>Impurity<br>0.90 RRT | 31046     | 0.01  | 1    | 100 | Result % | LIMIT |
|---------------------------------|-----------|-------|------|-----|----------|-------|
|                                 | 154714.67 | 14.45 | 0.41 |     | 0.0299   | 0.05% |

**HPLC purity of gabapentin API (1) obtained from gabalactam 4 via intermediate 3 (Gaba later method):**

**Gabapentin API (1) obtained from first lot of gabapentin hydrochloride (5) (Gaba later method):**

Sample ID : Gabapentin pure: GP/JVP/VVP/652/20 A  
 User : Guru  
 File Name : D:\System 90\LC\_12\Data\2012\May-2012\11052012\Gaba later\11\_May\_012.dat  
 Method : D:\System 90\LC\_12\Method\Gaba Later.met  
 Acquired : 5/11/2012 2:08:31 PM  
 Printed : 5/11/2012 3:41:57 PM  
**Chromatographic Conditions :**  
 Column : Phenomenex C-18 250mm x 4.6mm x 5  $\mu$  [Col No:HBR-LC-178]  
 Mobile Phase : 35:35:30 / Buffer:ACN: MeOH  
 Buffer : 0.58g Amm.phosphate +1.83g sodium perchlorate in 1L Water,adjust pH 1.8 with HClO4.  
 Flow rate : 1.0ml/min, Volume: 20 $\mu$ l, Detector : 215nm, Column Temp:40°C

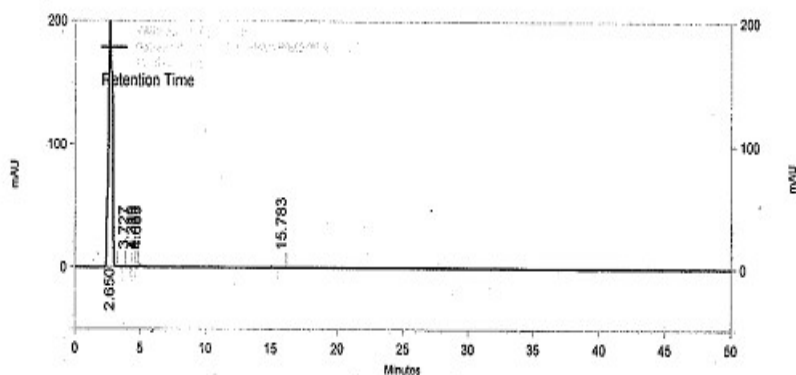

VWD: Signal A,  
 215 nm Results

| Pk #   | Retention Time | Height  | Area     | Area Percent | Relative RT |
|--------|----------------|---------|----------|--------------|-------------|
| 1      | 2.65           | 3647611 | 70594769 | 99.9132      | 0.167       |
| 2      | 3.73           | 1648    | 13711    | 0.0194       | 0.236       |
| 3      | 4.31           | 1533    | 8142     | 0.0115       | 0.273       |
| 4      | 4.48           | 1290    | 9474     | 0.0134       | 0.284       |
| 5      | 4.68           | 2086    | 13363    | 0.0189       | 0.296       |
| 6      | 15.78          | 902     | 16622    | 0.0235       | 1.000       |
| Totals |                | 3655070 | 70656081 | 100.0000     |             |

**Continued to page number 20**

**Gabapentin-USP (Late eluting impurity)**

|                |         |  |
|----------------|---------|--|
| standard imp-D |         |  |
| 1              | 535072  |  |
| 2              | 531392  |  |
| 3              | 535322  |  |
| Average        | 533929  |  |
| Std            | 2200.37 |  |
| RSD            | 0.41    |  |

Gabapentin

B.No:GPI/JVP/VVP/652/20 A

|             |                                 |               |
|-------------|---------------------------------|---------------|
| imp-D Std   | 2.83 mg---->10 ml-->1ml-->100ml | 0.00283 mg/ml |
| Sample conc | 142.02 mg---->10ml              | 14.202 mg/ml  |

|               |                              |                   |          |                 |             |     |
|---------------|------------------------------|-------------------|----------|-----------------|-------------|-----|
| Any impurity= | Area of imp<br>Area of imp-D | wt of imp-D<br>10 | 1<br>100 | 25<br>wt of spl | 1<br>factor | 100 |
|---------------|------------------------------|-------------------|----------|-----------------|-------------|-----|

|            |        |         |     |     |       |   |
|------------|--------|---------|-----|-----|-------|---|
| impurity-D | 16622  | 0.00283 | 1   | 100 | 0.001 | % |
|            | 533929 | 14.202  | 1.0 |     |       |   |

|                                |        |         |       |     |       |   |
|--------------------------------|--------|---------|-------|-----|-------|---|
| unknown impurity<br>(RRT 0.23) | 13711  | 0.00294 | 1     | 100 | 0.021 | % |
|                                | 533929 | 14.202  | 0.025 |     |       |   |

|                                |        |         |        |     |          |   |
|--------------------------------|--------|---------|--------|-----|----------|---|
| unknown impurity<br>(RRT 0.84) | 0      | 0.00283 | 1      | 100 | 0.000000 | % |
|                                | 533929 | 14.202  | 66.000 |     |          |   |

|                                |        |         |       |     |       |   |
|--------------------------------|--------|---------|-------|-----|-------|---|
| unknown impurity<br>(RRT 0.27) | 8142   | 0.00283 | 1     | 100 | 0.012 | % |
|                                | 533929 | 14.202  | 0.025 |     |       |   |

|                                |        |         |       |     |       |   |
|--------------------------------|--------|---------|-------|-----|-------|---|
| unknown impurity<br>(RRT 0.28) | 9474   | 0.00283 | 1     | 100 | 0.014 | % |
|                                | 533929 | 14.202  | 0.025 |     |       |   |

|  |  |  |  |  |  |  |
|--|--|--|--|--|--|--|
|  |  |  |  |  |  |  |
|--|--|--|--|--|--|--|

DM  
11/05/12

**Gabapentin API (1) obtained from second lot of gabapentin hydrochloride (5) (Gaba later method):**

Sample ID : Gabapentin pure: GP/JVP/VVP/652/20 B  
 User : Guru  
 File Name : D:\System 90\LC\_12\Data\2012\May-2012\11052012\Gaba later\11\_May\_013.dat  
 Method : D:\System 90\LC\_12\Method\Gaba Later.met  
 Acquired : 5/11/2012 3:03:50 PM  
 Printed : 5/11/2012 4:09:35 PM  
**Chromatographic Conditions :**  
 Column : Phenomenex C-18 250mm x 4.6mm x 5  $\mu$  [Col No:HBR-LC-178]  
 Mobile Phase : 35:35:30 / Buffer: ACN: MeOH  
 Buffer : 0.58g Amm.phosphate +1.83g sodium perchlorate in 1L Water, adjust pH 1.8 with HClO<sub>4</sub>.  
 Flow rate : 1.0ml/min, Volume: 20 $\mu$ l, Detector : 215nm, Column Temp: 40°C

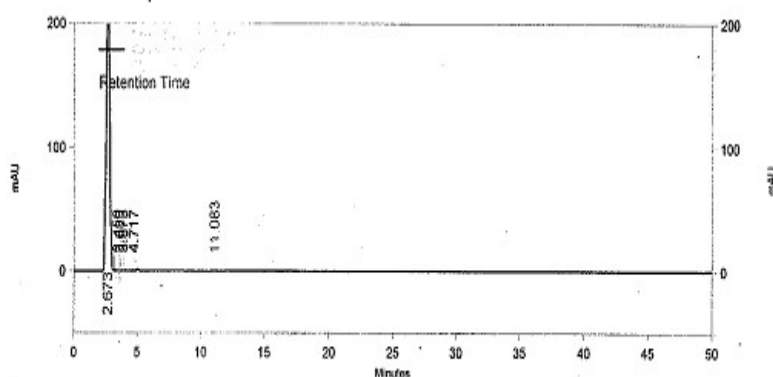

VWD: Signal A, 215  
 nm Results

| Pk #   | Retention Time | Height  | Area     | Area Percent |
|--------|----------------|---------|----------|--------------|
| 1      | 2.67           | 3810775 | 71613095 | 99.8647      |
| 2      | 3.45           | 3444    | 19051    | 0.0266       |
| 3      | 3.63           | 815     | 3149     | 0.0044       |
| 4      | 3.87           | 2822    | 20864    | 0.0291       |
| 5      | 4.72           | 4899    | 31365    | 0.0437       |
| 6      | 11.08          | 1149    | 22605    | 0.0315       |
| Totals |                | 3823904 | 71710129 | 100.0000     |

Continued to page number 22

**Gabapentin-USP (Late eluting impurity)**

|                |         |
|----------------|---------|
| standard imp-D |         |
| 1              | 535072  |
| 2              | 531392  |
| 3              | 535322  |
| Average        |         |
| 533929         |         |
| Std            | 2200.37 |
| RSD            | 0.41    |

Gabapentin

B.No:GP/JVP/VVP/652/20 B

|             |                                 |               |
|-------------|---------------------------------|---------------|
| imp-D Std   | 2.83 mg---->10 ml-->1ml-->100ml | 0.00283 mg/ml |
| Sample conc | 141.16 mg---->10ml              | 14.116 mg/ml  |

| Any impurity=                  | Area of imp<br>Area of imp-D | wt of imp-D<br>10 | 1<br>100 | 25<br>wt of spl | 1<br>factor | 100 |  |
|--------------------------------|------------------------------|-------------------|----------|-----------------|-------------|-----|--|
| impurity-D                     | 0                            | 0.00283           | 1        | 100             | 0.000       | %   |  |
|                                | 533929                       | 14.116            | 1.0      |                 |             |     |  |
| unknown impurity<br>(RRT 0.22) | 19051                        | 0.00294           | 1        | 100             | 0.030       | %   |  |
|                                | 533929                       | 14.116            | 0.025    |                 |             |     |  |
| unknown impurity<br>(RRT 0.84) | 0                            | 0.00283           | 1        | 100             | 0.000000    | %   |  |
|                                | 533929                       | 14.116            | 66.000   |                 |             |     |  |
| unknown impurity<br>(RRT 0.23) | 3149                         | 0.00283           | 1        | 100             | 0.005       | %   |  |
|                                | 533929                       | 14.116            | 0.025    |                 |             |     |  |
| unknown impurity<br>(RRT 0.24) | 20864                        | 0.00283           | 1        | 100             | 0.031       | %   |  |
|                                | 533929                       | 14.116            | 0.025    |                 |             |     |  |
| unknown impurity<br>(RRT 0.70) | 22605                        | 0.00283           | 1        | 100             | 0.034       | %   |  |
|                                | 533929                       | 14.116            | 0.025    |                 |             |     |  |

PM  
11/05/12

**Note:**

1. Gabapentin hydrochloride was obtained from gabalactam in two lots (first lot & second lot) and these two lots are separately processed to final gabapentin API (1) by following the patents reported by us (Reference 25 in the main manuscript). HPLC analyses were done by following the US Pharmacopeia method (Gaba early & Gaba later methods).
